# Supplementary material for: Improved Bioavailability of Montelukast through a Novel Oral Mucoadhesive Film in Humans and Mice
Source: PubMed Central journal article supplement (PMC7822410; doi:10.3390/pharmaceutics13010012), 2020-12-23
Supplement: pharmaceutics-13-00012-s001.pdf [file pharmaceutics-13-00012-s001.pdf]

# Supplementary Materials: Improved Bioavailability of Montelukast through a Novel Oral Mucoadhesive Film in Humans and Mice

Johanna Michael, Diana Bessa de Sousa, Justin Conway, Erick Gonzales-Labrada, Rodolphe Obeid, Julia Tevini, Thomas Felder, Birgit Hutter-Paier, Horst Zerbe, Nadine Paiement and Ludwig Aigner

Table S1. Detailed clinical laboratory assessment of Phase 1 study subjects.

| Test                           | Components                                                                                                                                                                                                       |                                                                                                                                                                                                                   |
|--------------------------------|------------------------------------------------------------------------------------------------------------------------------------------------------------------------------------------------------------------|-------------------------------------------------------------------------------------------------------------------------------------------------------------------------------------------------------------------|
| Hematology                     | <ul style="list-style-type: none"> <li>• Hemoglobin</li> <li>• Platelet count</li> <li>• WBC and differential</li> </ul>                                                                                         | <ul style="list-style-type: none"> <li>• Peripheral blood smear</li> <li>• Hematocrit</li> <li>• RBC</li> </ul>                                                                                                   |
| Serum Chemistry                | <ul style="list-style-type: none"> <li>• Glucose</li> <li>• Calcium</li> <li>• Sodium</li> <li>• Chloride</li> <li>• Albumin</li> <li>• Protein</li> <li>• Bilirubin</li> <li>• Lactate Dehydrogenase</li> </ul> | <ul style="list-style-type: none"> <li>• AST</li> <li>• ALT</li> <li>• Potassium</li> <li>• Alkaline Phosphatase</li> <li>• Urea</li> <li>• Uric Acid</li> <li>• Creatinine</li> <li>• Creatine Kinase</li> </ul> |
| Urinalysis                     | <ul style="list-style-type: none"> <li>• Bilirubin</li> <li>• Blood</li> <li>• Glucose</li> <li>• pH</li> <li>• Ketones</li> </ul>                                                                               | <ul style="list-style-type: none"> <li>• Leukocytes</li> <li>• Nitrites</li> <li>• Protein</li> <li>• Specific Gravity</li> <li>• UBG</li> </ul>                                                                  |
| Additional Tests               | Serology (HIV, Hepatitis B surface antigen, Hepatitis C antibody)                                                                                                                                                | Alcohol test<br>Urine Cotinine<br>Serum hCG (females only at screening)<br>Urine hCG (females only at each period check-in)                                                                                       |
| Urine Tests for Drugs of Abuse | Marijuana, Amphetamines, Phencyclidine, Barbiturates, Cocaine, Opiates, Benzodiazepines                                                                                                                          |                                                                                                                                                                                                                   |

**Table S2.** Detailed study demographics of Phase 1 study subjects.

| Subject No. | Age (years) | Height |      | Weight |       | BMI  | Gender | Race/Ethnicity  |
|-------------|-------------|--------|------|--------|-------|------|--------|-----------------|
|             |             | (cm)   | (in) | (kg)   | (lb)  |      |        |                 |
| 1           | 41          | 172.3  | 67.8 | 84.6   | 186.5 | 28.5 | Male   | Black           |
| 2           | 45          | 154.8  | 60.9 | 55     | 121.3 | 23   | Female | Hispanic/Latino |
| 3           | 48          | 186.8  | 73.5 | 98.7   | 217.6 | 28.3 | Male   | White           |
| 4           | 47          | 173.5  | 68.3 | 74.1   | 163.4 | 24.6 | Female | Black           |
| 5           | 46          | 161.5  | 63.6 | 76.8   | 169.3 | 29.4 | Male   | Hispanic/Latino |
| 6           | 31          | 179.5  | 70.7 | 72.1   | 159   | 22.4 | Male   | Black           |
| 7           | 50          | 180.7  | 71.1 | 75.5   | 166.4 | 23.1 | Male   | White           |
| 8           | 46          | 182.5  | 71.9 | 96.5   | 212.7 | 29   | Male   | White           |
